# Supplementary material for: Risk factors for COVID-19 infection, disease severity and related deaths in Africa: a systematic review
Source: PubMed Central journal article supplement — BMJ Open. 2021 Feb 18;11(2):e044618. doi: 10.1136/bmjopen-2020-044618 (PMC7896374; doi:10.1136/bmjopen-2020-044618), 2021-02-18
Supplement: bmjopen-2020-044618supp001.pdf [file bmjopen-2020-044618supp001.pdf]

**Appendix 1: Search strategy**

| No             | Terms/keywords                                                                                                                                                                         |
|----------------|----------------------------------------------------------------------------------------------------------------------------------------------------------------------------------------|
| <b>Medline</b> |                                                                                                                                                                                        |
| 1              | Coronavirus/ or Coronavirus Infections/ or COVID-19.mp                                                                                                                                 |
| 2              | coronavirus.mp                                                                                                                                                                         |
| 3              | SARS-CoV-2.mp                                                                                                                                                                          |
| 4              | n-CoV.mp                                                                                                                                                                               |
| 5              | 2019-nCoV.mp                                                                                                                                                                           |
| 6              | 1 or 2 or 3 or 4 or 5                                                                                                                                                                  |
| 7              | Africa.mp. or exp Africa/                                                                                                                                                              |
| 8              | 6 and 7                                                                                                                                                                                |
| 9              | limit 15 to (English language and humans and year="2019 - 2020")                                                                                                                       |
| <b>PubMed</b>  |                                                                                                                                                                                        |
| 1              | "COVID-19" OR coronavirus OR "SARS-CoV-2" OR "n-CoV" OR "2019-nCoV"                                                                                                                    |
| 2              | Africa*                                                                                                                                                                                |
| 3              | ((("COVID-19" OR coronavirus OR "SARS-CoV-2" OR "n-CoV" OR "2019-nCoV")) AND (Africa))                                                                                                 |
| 4              | ((("COVID-19" OR coronavirus OR "SARS-CoV-2" OR "n-CoV" OR "2019-nCoV")) AND (Africa) Sort by: Best Match Filters: Publication date from 2019/12/01; Humans; English                   |
| <b>Scopus</b>  | (TITLE-ABS-KEY ( "COVID-19" OR coronavirus OR "SARS-CoV-2" OR "n-CoV" OR "2019-nCoV")) AND ( TITLE-ABS-KEY (africa) AND ( LIMIT-TO ( PUBYEAR , 2020 ) OR LIMIT-TO ( PUBYEAR , 2019 ) ) |

\*list of countries was considered

## Appendix 2: JBI quality appraisal and selection tool

### JBI Critical Appraisal Checklist for Descriptive / Case Series

Reviewer ..... Date .....

Author ..... Year ..... Record Number .....

|                                                                                     | Yes                      | No                       | Unclear                  | Not Applicable           |
|-------------------------------------------------------------------------------------|--------------------------|--------------------------|--------------------------|--------------------------|
| 1. Was study based on a random or pseudo-random sample?                             | <input type="checkbox"/> | <input type="checkbox"/> | <input type="checkbox"/> | <input type="checkbox"/> |
| 2. Were the criteria for inclusion in the sample clearly defined?                   | <input type="checkbox"/> | <input type="checkbox"/> | <input type="checkbox"/> | <input type="checkbox"/> |
| 3. Were confounding factors identified and strategies to deal with them stated?     | <input type="checkbox"/> | <input type="checkbox"/> | <input type="checkbox"/> | <input type="checkbox"/> |
| 4. Were outcomes assessed using objective criteria?                                 | <input type="checkbox"/> | <input type="checkbox"/> | <input type="checkbox"/> | <input type="checkbox"/> |
| 5. If comparisons are being made, was there sufficient descriptions of the groups?  | <input type="checkbox"/> | <input type="checkbox"/> | <input type="checkbox"/> | <input type="checkbox"/> |
| 6. Was follow up carried out over a sufficient time period?                         | <input type="checkbox"/> | <input type="checkbox"/> | <input type="checkbox"/> | <input type="checkbox"/> |
| 7. Were the outcomes of people who withdrew described and included in the analysis? | <input type="checkbox"/> | <input type="checkbox"/> | <input type="checkbox"/> | <input type="checkbox"/> |
| 8. Were outcomes measured in a reliable way?                                        | <input type="checkbox"/> | <input type="checkbox"/> | <input type="checkbox"/> | <input type="checkbox"/> |
| 9. Was appropriate statistical analysis used?                                       | <input type="checkbox"/> | <input type="checkbox"/> | <input type="checkbox"/> | <input type="checkbox"/> |

Overall appraisal:      Include                   Exclude                   Seek further info

Comments (Including reason for exclusion)

---



---



---

**Appendix 3: JBI data extraction tool****JBI Data Extraction Form for  
Experimental / Observational Studies**

Reviewer ..... Date .....

Author ..... Year .....

Journal ..... Record Number .....

**Study Method**RCT  Quasi-RCT  Longitudinal Retrospective  Observational  Other **Participants**Setting  
\_\_\_\_\_Population  
\_\_\_\_\_**Sample size**

Group A \_\_\_\_\_ Group B \_\_\_\_\_

**Interventions**Intervention A  
\_\_\_\_\_  
\_\_\_\_\_Intervention B  
\_\_\_\_\_  
\_\_\_\_\_Authors Conclusions:  
\_\_\_\_\_  
\_\_\_\_\_  
\_\_\_\_\_Reviewers Conclusions:  
\_\_\_\_\_  
\_\_\_\_\_  
\_\_\_\_\_

## Appendix 4: Assessment of methodological quality (n=15)

| Authors, year                              | <i>Cross-sectional studies</i>                       |                                                                |                                                                              |                                                  |                                                                           |                                                         |                                                                                  |                                         |                                            |      |
|--------------------------------------------|------------------------------------------------------|----------------------------------------------------------------|------------------------------------------------------------------------------|--------------------------------------------------|---------------------------------------------------------------------------|---------------------------------------------------------|----------------------------------------------------------------------------------|-----------------------------------------|--------------------------------------------|------|
|                                            | Was study based on a random or pseudo-random sample? | Were the criteria for inclusion in the sample clearly defined? | Were confounding factors identified and strategies to deal with them stated? | Were outcomes assessed using objective criteria? | If comparisons are being made, was there sufficient comparison of groups? | Was the follow-up carried out over a sufficient period? | Were the outcomes of people who withdrew described and included in the analysis? | Were outcomes measured in reliable way? | Was appropriate statistical analysis used? | %    |
| Bergman et al (2020) <sup>18</sup>         | N                                                    | NA                                                             | Y                                                                            | Y                                                | NA                                                                        | Y                                                       | NA                                                                               | U                                       | Y                                          | 80   |
| Clark et al (2020) <sup>19</sup>           | NA                                                   | Y                                                              | Y                                                                            | Y                                                | NA                                                                        | NA                                                      | NA                                                                               | Y                                       | Y                                          | 100  |
| Daon et al(2020) <sup>20</sup>             | NA                                                   | Y                                                              | Y                                                                            | Y                                                | NA                                                                        | NA                                                      | NA                                                                               | Y                                       | Y                                          | 100  |
| Davies et al (2020) <sup>7</sup>           | NA                                                   | Y                                                              | Y                                                                            | Y                                                | NA                                                                        | NA                                                      | NA                                                                               | Y                                       | Y                                          | 100  |
| Diop et al (2020) <sup>21</sup>            | NA                                                   | Y                                                              | Y                                                                            | Y                                                | NA                                                                        | NA                                                      | NA                                                                               | Y                                       | Y                                          | 100  |
| Hossain et al (2020) <sup>23</sup>         | N                                                    | Y                                                              | U                                                                            | Y                                                | Y                                                                         | N                                                       | NA                                                                               | Y                                       | Y                                          | 72   |
| Jaffé et al (2020) <sup>24</sup>           | N                                                    | Y                                                              | U                                                                            | Y                                                | Y                                                                         | N                                                       | NA                                                                               | Y                                       | Y                                          | 72   |
| Kubota <i>et al</i> (2020) <sup>25</sup>   | N                                                    | Y                                                              | Y                                                                            | Y                                                | Y                                                                         | N                                                       | NA                                                                               | Y                                       | Y                                          | 86   |
| Maitra et al (2020) <sup>26</sup>          | N                                                    | Y                                                              | Y                                                                            | Y                                                | NA                                                                        | NA                                                      | NA                                                                               | Y                                       | Y                                          | 83   |
| Gayawan et al (2020) <sup>22</sup>         | N                                                    | Y                                                              | N                                                                            | Y                                                | Y                                                                         | N/A                                                     | N/A                                                                              | Y                                       | Y                                          | 80%  |
| Maraghi et al. (2020) <sup>27</sup>        | Yes                                                  | Yes                                                            | Yes                                                                          | No                                               | Yes                                                                       | NA                                                      | NA                                                                               | No                                      | Yes                                        | 85.7 |
| Muneer <i>et al</i> (2020) <sup>28</sup>   | Y                                                    | Y                                                              | N                                                                            | Y                                                | Y                                                                         | NA                                                      | NA                                                                               | Y                                       | Y                                          | 86   |
| Okpokoro et al (2020) <sup>8</sup>         | Y                                                    | Y                                                              | N                                                                            | Y                                                | Y                                                                         | NA                                                      | NA                                                                               | Y                                       | Y                                          | 86   |
| Onovo et al (2020) <sup>9</sup>            | Y                                                    | Y                                                              | Y                                                                            | Y                                                | Y                                                                         | NA                                                      | NA                                                                               | Y                                       | Y                                          | 100  |
| Ortiz-Fernández et al (2020) <sup>29</sup> | Y                                                    | Y                                                              | N                                                                            | Y                                                | N                                                                         | NA                                                      | NA                                                                               | Y                                       | Y                                          | 72   |

Y=Yes; N= No; U= Unclear; NA= Not applicable; %= Percentage of score
